# Supplementary material for: Household practices related to disease transmission between animals and humans in rural Cambodia
Source: Springer Nature journal article supplement (doi:10.1186/s12889-015-1811-5), 2015-05-08
Supplement: MOESM2 [file 9749446]

**Zoonoses in Humans and Livestock in Rural Cambodia**  
**Household questionnaire**

Occupation of interviewee: \_\_\_\_\_

Name of enumerator: \_\_\_\_\_

Age: \_\_\_\_\_ Sex: [ ] M [ ] F

Date today: \_\_\_\_\_

Education: \_\_\_\_\_

Person to revise this questionnaire: \_\_\_\_\_

**1. Village/Site Name and Household Descriptors**

|                                       |                                         |                                                  |
|---------------------------------------|-----------------------------------------|--------------------------------------------------|
| (Village/Site Name):                  | (District):                             | (Province):                                      |
| (No. of men above 15 years in the HH) | (No. of women above 15 years in the HH) | (No. of children 15 years and below in the HH)   |
| (No. of chicken in the HH)            | (No. of ducks in the HH)                | (No. of other avian species in the HH, specify): |
| (No. of pigs in the HH)               | (No. of cattle in the HH)               | (No. of buffaloes in the HH)                     |

**1.1 Does the household own land for farming?**

- a. All farmland owned by the household .....
- b. Approximate proportion of farmland owned by the household .....

**1.2 Does the household have any of the following:**

|                             | Yes                      | No                       |
|-----------------------------|--------------------------|--------------------------|
| Concrete/Brick house        | <input type="checkbox"/> | <input type="checkbox"/> |
| Roof tiles                  | <input type="checkbox"/> | <input type="checkbox"/> |
| TV                          | <input type="checkbox"/> | <input type="checkbox"/> |
| Cell phone                  | <input type="checkbox"/> | <input type="checkbox"/> |
| Vehicle                     | <input type="checkbox"/> | <input type="checkbox"/> |
| Specify vehicle type: _____ |                          |                          |

**1.3 What are the main crops grown by this household?**

.....  
.....

1.4 Has this household been involved in any development support (Government or NGO)?

- No
- Yes, please specify

**2. Human Health**

2.1 What main source of water do you use for drinking in this household?

- Well, untreated
- Well, treated. Specify how .....
- Nearby river or stream, untreated
- Nearby river or stream, treated. Specify how .....
- Bottled water
- Rain water, untreated
- Rain water, treated. Specify how .....
- Other, specify .....

2.2 How many days per month do you eat the following in your household:

Pork ..... Beef .....

Fish ..... Poultry .....

Egg: ..... Wildlife ..... Other (specify): .....

2.3 Who is responsible for preparing food in this household?

.....

2.4 What do you practice in this household?

Yes No

- Eat undercooked meat
- Feed your livestock uncooked meat waste
- Cull sick animals for consumption
- Eat animals found dead
- Wash hands with soap before and after cooking
- Wash hands with soap after handling live animals
- Keep live animals away from sleeping and food preparation areas
- Burry or burn meat waste products
- Daily collection of manure in-and outdoor
- Capture and slaughter wild animals for consumption

2.5 Do you slaughter domestic animals in this household?

- No
- Yes

2.6 If yes in Q 2.5 kindly explain how you dispose of slaughter waste products

.....  
.....

2.7 Has any member of the household suffered from the following signs during the last 14 days:

Yes No

- Diarrhoea or loose stool
- Bloody diarrhoea/stool
- Abdominal pain
- Fever
- Head and/or body ache
- Cough
- Shortness of breath
- Vomiting
- Nausea

### 3. Livestock System

3.1 How often are there episodes of severe disease among your livestock causing high mortality?

- At least once a year
- Once every 2 -3 years
- Every 5 years
- Other, specify.....

3.2 How often are there episodes of less severe disease among your livestock i.e. respiratory diseases, gastrointestinal diseases and abortions?

- At least once a year
- Once every 2 -3 years
- Every 5 years
- Other, specify.....

3.3 What season, if any, do outbreaks of disease in livestock usually occur?

.....

3.4 Do you use any routine animal health treatments (such as use of vaccines or anthelmintics)?

- No
- Yes, what & when .....

3.5 Which member/s of the household assume the responsibility of looking after the livestock?

#### Pigs

- Employees
- Women
- Men
- Children
- Combination, specify

.....

#### Avian (chicken, ducks, geese, turkeys etc.)

- Employees
- Women
- Men
- Children
- Combination, specify

.....

#### Ruminants (cattle and buffaloes)

- Employees
- Women
- Men
- Children
- Combination, specify

.....

3.6 What is the source of water used for livestock?

- Well
- Nearby river or stream
- Other, specify.....

3.7 How do you keep your livestock?

**Pigs**

- Free ranging
- Combination of free ranging and confined
- Confined with other pigs only
- Confined mixed with other species
- Combination, specify

.....

**Avian**

- Free ranging
- Combination of free ranging and confined
- Confined with the same avian species only
- Confined mixed with other species
- Combination, specify

.....

**Ruminants**

- Free ranging
- Combination of free ranging and confined
- Confined with other ruminants
- Confined mixed with other species
- Combination, specify

.....

3.8 If you do not keep your livestock confined kindly explain why?

.....

3.9 What is livestock usually reared for?

**Pigs**

- Sale
- Family consumption
- To be kept for sale in an emergency
- Other, specify

.....

**Avian**

- Sale
- Family consumption
- To be kept for sale in an emergency
- Other, specify

.....

**Ruminants**

- Sale
- Family consumption
- To be kept for sale in an emergency
- Draught power
- Other, specify

.....

3.10 Rank the most common trading practice when livestock are sold with 1=the most common one etc.

**Pigs**

- Animals are taken directly to slaughter-house
- Animals are taken to local market
- Animals are sold to farmers in nearby villages
- Animals are sold to farmers in this villages
- Animals are sold to middleman
- Other, specify

.....

**Avian**

- Animals are taken directly to slaughter-house
- Animals are taken to local market
- Animals are sold to farmers in nearby villages
- Animals are sold to farmers in this villages
- Animals are sold to middleman
- Other, specify

.....

**Ruminants**

- Animals are taken directly to slaughter-house
- Animals are taken to local market
- Animals are sold to farmers in nearby villages
- Animals are sold to farmers in this villages
- Animals are sold to middleman
- Other, specify

.....

3.11 Rank the most common trading practice when livestock are purchased with 1=the most common one etc.

**Pigs**

- Purchased from local market, specify name of the market.....
- Animals are purchased from a middleman
- Animals are purchased from farmers in this village
- Animals are purchased from farmers in nearby villages
- Animals are purchased from government or private animal farm
- Other, specify.....

**Avian**

- Purchased from local market, specify name of the market.....
- Animals are purchased from a middleman
- Animals are purchased from farmers in this village
- Animals are purchased from farmers in nearby villages
- Animals are purchased from government or private animal farm
- Other, specify.....

**Ruminants**

- Purchased from local market, specify name of the market.....
- Animals are purchased from a middleman
- Animals are purchased from farmers in this village
- Animals are purchased from farmers in nearby villages
- Animals are purchased from government or private animal farm
- Other, specify.....

3.12 What do you usually do when you have sick livestock?

- Separate sick from healthy livestock
- Slaughter sick livestock for consumption
- Slaughter and destroy sick livestock
- Sell sick and healthy livestock
- Sell sick livestock only
- Give away sick livestock
- Vaccinate sick and healthy livestock, Specify vaccine.....
- Treat sick livestock, Specify treatment.....
- Do nothing
- Other, specify.....

3.13 What do you usually do if your livestock die?

- Trough away livestock found dead
- Eat livestock found dead
- Burn or bury livestock found dead
- Sell the remaining livestock
- Give away the remaining livestock
- Vaccinate the remaining stock, Specify vaccine.....
- Other, specify.....

3.14 Do you notice an increase in the incidence of disease after 'new' stock is introduced into the village?

- Yes
- No

3.15 Do you see any likelihood of transmission of diseases between humans, animals and wildlife in this village?

- No
- Yes, please specify

.....

3.16 What diseases with possible transmission between humans, animals and wildlife do you know of?

- None
- Some, please specify

.....

.....
